# Supplementary material for: Replication Pauses of the Wild-Type and Mutant Mitochondrial DNA Polymerase Gamma: A Simulation Study
Source: PubMed Central journal article supplement (PMC3219627; doi:10.1371/journal.pcbi.1002287), 2011-11-17
Supplement: pcbi.1002287.s001.pdf [file pcbi.1002287.s001.pdf]

**Table S1.** Kinetic parameters  $k_{pol}$  (1/s) for base pairings when the previously inserted nucleotide pair is a correct Watson-Crick pair [1].

| <b>Base pairings</b> | <b>T</b> | <b>G</b> | <b>C</b> | <b>A</b> |
|----------------------|----------|----------|----------|----------|
| <b>A</b>             | 25       | 0.08     | 0.1      | 0.0036   |
| <b>C</b>             | 0.012    | 37       | 0.003    | 0.1      |
| <b>G</b>             | 0.16     | 0.066    | 43       | 0.042    |
| <b>T</b>             | 0.013    | 1.16     | 0.038    | 45       |

The identity of the template strand nucleotide is given in the rows (in the order A, C, G, T from top to bottom). The identity of the nucleotide inserted in the new DNA strand is given on the columns (in the order T, G, C, A from left to right).

## REFERENCES

1. Johnson AA, Johnson KA (2001) Fidelity of nucleotide incorporation by human mitochondrial DNA polymerase. *Journal of Biological Chemistry* 276: 38090-38096.
